# Supplementary material
Source: MDPI journal article supplement (https://www.mdpi.com/1999-4907/6/6/2125)
Supplement: s1 [file s1]

Supplementary

**Table S1.** Parameter list for water uptake model 2 (WU2).

| **Parameter** | **Symbol** | **Unit** | **Value** | **Source** |
| --- | --- | --- | --- | --- |
| species specific root length per dry mass | *lSRL* (pine) | m g-1 DW | 15 | [1] |
| *lSRL* (oak) | 30 |
| constant for sandy soils | *B* | dimensionless | 1.6 | [2] |
| fine root radius | *rr* | m | 0.001 | [2] |
| Air entry potential | *Pe* | kPa | −0.34 | [2] |
| critical leaf water potential for stomata closure | *Pcrit* | kPa | −2500 | this study |
| Total leaf resistance | *Rleaf* | m4 kg-1 s-1 | 2.2 × 106 | [2] |
| Total root resistance low (WU2-low) | *Rrtot* | m4 kg-1 s-1 | 4.0 × 106 | this study |
| Total root resistance medium (WU2-medium) | 9.0 × 106 |
| Total root resistance high (WU2-high) | 4.0 × 107 |

**Table S2.** Location of forest sites and permanent climate station.

| **Site** | **Latitude [decimal] (stand/station)** | **Longitude [decimal] (stand/station)** | **Height [m a.s.l.] (stand/station)** | **Distance [km]** |
| --- | --- | --- | --- | --- |
| P1 | 53.14/53.15 | 13.04/12.97 | 75/62 | 4.8 |
| P2 | 52.16/52.22 | 14.12/14.02 | 75/98 | 9.5 |
| M1 | 52.85/52.87 | 12.18/11.98 | 48/24 | 13.6 |
| M2 | 52.21/52.17 | 14.48/14.25 | 73/43 | 15.8 |

**Table S3.** Drought years for specific sites and species.

| **P1** | **P2** | **M1 Pine** | **M1 Oak** | **M2 Pine** | **M2 Oak** |
| --- | --- | --- | --- | --- | --- |
| 1952 | - | - | - | - | - |
| 1959 | - | 1959 | 1959 | - | 1959 |
| - | 1960 | - | - | - | - |
| - | - | - | 1963 | - | - |
| 1968 | - | - | - | - | - |
| 1975 | - | - | - | - | - |
| 1976 | 1976 | 1976 | 1976 | 1976 | 1976 |
| - | - | 1982 | 1982 | - | - |
| 1983 | - | 1983 | - | - | - |
| 1989 | 1989 | 1989 | 1989 | - | 1989 |
| - | - | 1990 | - | - | - |
| 1991 | 1991 | - | - | 1991 | - |
| 1992 | - | 1992 | - | 1992 | 1992 |
| - | - | - | 1996 | - | - |
| - | - | - | - | - | 1999 |
| - | 2003 | 2003 | 2003 | 2003 | 2003 |
| - | - | 2006 | - | 2006 | - |

**Table S4.** Comparison of different water uptake models on the base of standardized tree ring indexes.

| **site** | **tree species** | **model** | **root resistance** | ***r**** | ***Gxy**** | ***SI**** | ***DI**** |
| --- | --- | --- | --- | --- | --- | --- | --- |
| P1 | Pine | WU1 | - | 37.9 | 63.5 | 55.7 | 66.7 |
| P1 | Pine | WU2 | low | 53.4 | 69.2 | 90.0 | 77.8 |
| P1 | Pine | WU2 | medium | 55.9 | 69.2 | 88.4 | 88.9 |
| P1 | Pine | WU2 | high | 43.2 | 67.3 | 95.7 | 77.8 |
| P2 | Pine | WU1 | - | 29.5 | 65.4 | 59.5 | 66.7 |
| P2 | Pine | WU2 | low | 30.5 | 61.5 | 12.6 | 83.3 |
| P2 | Pine | WU2 | medium | 30.4 | 63.5 | 20.6 | 83.3 |
| P2 | Pine | WU2 | high | 32.8 | 71.2 | 14.3 | 83.3 |
| M1 | Pine | WU1 | - | 14.8 | 51.9 | 46.4 | 0.0 |
| M1 | Pine | WU2 | low | 36.9 | 51.9 | 42.6 | 11.1 |
| M1 | Pine | WU2 | medium | 48.3 | 63.0 | 36.4 | 22.2 |
| M1 | Pine | WU2 | high | 36.5 | 68.5 | 45.8 | 33.3 |
| M1 | Oak | WU1 | - | 25.2 | 48.1 | 55.9 | 42.9 |
| M1 | Oak | WU2 | low | 23.7 | 48.1 | 56.5 | 42.9 |
| M1 | Oak | WU2 | medium | 33.0 | 61.1 | 62.9 | 71.4 |
| M1 | Oak | WU2 | high | 41.1 | 63.0 | 94.1 | 85.7 |
| M2 | Pine | WU1 | - | 14.5 | 57.4 | 49.4 | 0.0 |
| M2 | Pine | WU2 | low | 12.5 | 61.1 | 43.0 | 40.0 |
| M2 | Pine | WU2 | medium | 34.2 | 68.5 | 54.6 | 60.0 |
| M2 | Pine | WU2 | high | 38.8 | 63.0 | 72.5 | 60.0 |
| M2 | Oak | WU1 | - | 6.7 | 57.4 | 40.1 | 50.0 |
| M2 | Oak | WU2 | low | 0.0 | 42.6 | 54.6 | 16.7 |
| M2 | Oak | WU2 | medium | 8.6 | 59.3 | 86.2 | 50.0 |
| M2 | Oak | WU2 | high | 37.3 | 64.8 | 78.3 | 100.0 |

References

1. 1. Hornschuch, F.; Krakau, U.; Riek, W. Das Wurzelsystem der Kiefer—Artspezifische Strategie und ökologische Anpassungen. In *Die Kiefer im nordostdeutschen Tiefland—Ökologie und Bewirtschaftung*; Eberswalder Forstliche Schriftenreihe Band XXXII: Eberswalde, Germany, 2007; pp. 108–117.
2. 2. Campbell, G.S. Simulations of Water Uptake by Plant Roots. In *Modeling Plant and Soil Systems*; Hanks, J., Ritchie, J.T., Eds.; American Society of Agronomy: Madison, WI, USA, 1991;
   pp. 273–285.
